# Supplementary material for: Older Adults Who Maintained a Regular Physical Exercise Routine before the Pandemic Show Better Immune Response to Vaccination for COVID-19
Source: MDPI journal article supplement (doi:10.3390/ijerph20031939), 2023-01-20
Supplement: s1 [file s1]

## Supplementary material

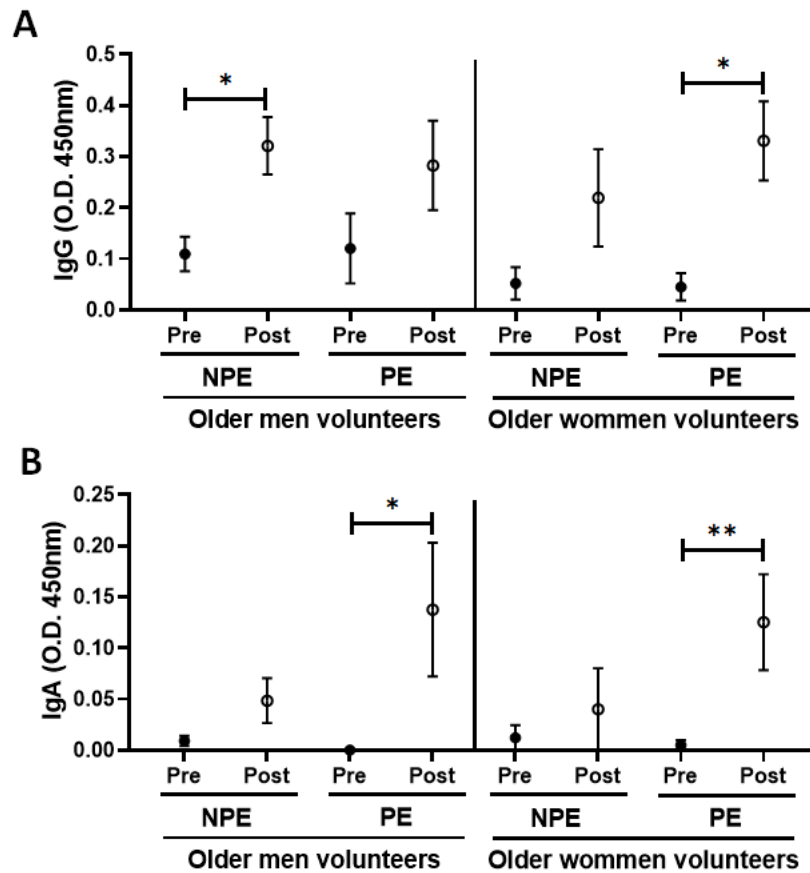

Supplementary Figure S1. Total serum concentration (O.D. 450nm) of specific IgG (A) and IgA (B) for SARS-CoV-2 antigens before (pre) and after 30 days (post) of administration of the second dose of ChadOx-1 vaccine in the subgroups of older men and older women who regularly practiced (PE) or not (NPE) a physical exercise program before the pandemic period. Data are presented as median and interquartile range. \*p<0.05; \*\*p<0.01.
